# Supplementary material for: Comparison of Oyster Aquaculture Methods and Their Potential to Enhance Microbial Nitrogen Removal From Coastal Ecosystems
Source: Frontiers journal article supplement (doi:10.3389/fmars.2021.633314), 2021-03-24
Supplement: Table_1.docx [file Table_1.docx]

**Table S1.** Temperature, salinity and dissolved oxygen measurements at different depths along the water column (15-60 cm) for the different treatments and the control sites.

|  | | **Control** | | | | | | | | | | **Floating bags** | | | | | | | | | | | | | **Oyster Gro** | | | | | | | | | | | | **Bottom cages** | | | | | | | | | | | | |
| --- | --- | --- | --- | --- | --- | --- | --- | --- | --- | --- | --- | --- | --- | --- | --- | --- | --- | --- | --- | --- | --- | --- | --- | --- | --- | --- | --- | --- | --- | --- | --- | --- | --- | --- | --- | --- | --- | --- | --- | --- | --- | --- | --- | --- | --- | --- | --- | --- | --- |
|  | | **Depth (cm)** | | **T oC** | | | **Salinity** | | | **DO (mg/L)** | | **Depth (cm)** | | **T oC** | | | | **Salinity** | | | | **DO (mg/L)** | | | **Depth**  **(cm)** | | | | **T oC** | | | **Salinity** | | | **DO (mg/L)** | | **Depth (cm)** | | | **T oC** | | | | **Salinity** | | | **DO (mg/L)** | | |
| 5-June 18 | | 15 | | 18.7 | | | 29.1 | | | 8.3 | | 15 | | 18.6 | | | | 29.1 | | | | 8.1 | | | 15 | | | | 18.6 | | | 29.1 | | | 7.3 | | 15 | | | 18.7 | | | | 29 | | | 7.7 | | |
| 30 | | 18.6 | | | 29.2 | | | 8.4 | | 60 | | 18.5 | | | | 29.2 | | | | 8.4 | | | 30 | | | | 18.6 | | | 29.3 | | | 7.8 | | 60 | | | 18.7 | | | | 29.1 | | | 8 | | |
| 60 | | 18.6 | | | 29.1 | | | 8.3 | |  | |  | | | |  | | | |  | | | 60 | | | | 18.4 | | | 29.4 | | | 7.5 | |  | | |  | | | |  | | |  | | |
| 19-June  18 | | 15 | | 22.7 | | | 29.8 | | | 5 | | 15 | | 23.2 | | | | 29.7 | | | | 5.8 | | | 15 | | | | 22.8 | | | 29.8 | | | 5.1 | | 30 | | | 23.3 | | | | 29.7 | | | 7.3 | | |
| 30 | | 22.7 | | | 29.4 | | | 4.9 | | 60 | | 23.1 | | | | 29.7 | | | | 5.1 | | | 30 | | | | 22.5 | | | 29.9 | | | 4.8 | | 60 | | | 23.4 | | | | 29.6 | | | 6.6 | | |
|  | |  | |  | | |  | | |  | |  | |  | | | |  | | | |  | | | 60 | | | | 22.5 | | | 30 | | | 4.7 | |  | | |  | | | |  | | |  | | |
| 2-July  18 | | 15 | | 27.9 | | | 26.4 | | | 9.1 | | 15 | | 27.9 | | | | 26.3 | | | | 8.9 | | | 15 | | | | 28.3 | | | 25.7 | | | 8.1 | | 15 | | | 27.9 | | | | 26.3 | | | 8.9 | | |
| 30 | | 27.6 | | | 26.6 | | | 9.3 | | 30 | | 27.6 | | | | 26.5 | | | | 9 | | | 30 | | | | 27.7 | | | 26.3 | | | 8.5 | | 30 | | | 27.9 | | | | 26.4 | | | 9.4 | | |
| 45 | | 27.6 | | | 26.6 | | | 9.5 | | 45 | | 27.5 | | | | 26.6 | | | | 8.9 | | | 45 | | | | 27.5 | | | 26.7 | | | 8.9 | | 45 | | | 27.9 | | | | 26.5 | | | 9.1 | | |
|  | |  | |  | | |  | | |  | |  | |  | | | |  | | | |  | | | 60 | | | | 27.5 | | | 26.8 | | | 7.5 | |  | | |  | | | |  | | |  | | |
| 17-July  18 | | 15 | | 27.1 | | | 27.6 | | | 4.7 | | 15 | | 27.2 | | | | 27.5 | | | | 5 | | | 15 | | | | 27 | | | 27.6 | | | 5 | | 15 | | | 27.6 | | | | 27.4 | | | 4.4 | | |
| 30 | | 27.1 | | | 27.6 | | | 4.5 | | 30 | | 27.2 | | | | 27.5 | | | | 4.2 | | | 30 | | | | 27 | | | 27.6 | | | 4.6 | | 30 | | | 27.6 | | | | 27.4 | | | 4.5 | | |
| 45 | | 27.2 | | | 27.6 | | | 4.7 | | 45 | | 27.2 | | | | 27.5 | | | | 4.1 | | | 60 | | | | 27 | | | 27.6 | | | 4.6 | |  | | |  | | | |  | | |  | | |
| 31-July  18 | | 30 | | 27.8 | | | 25.3 | | | 8.2 | | 15 | | 28.2 | | | | 25.9 | | | | 8.2 | | | 15 | | | | 27.6 | | | N/A | | | 9.7 | | 15 | | | 28.1 | | | | 26 | | | 8 | | |
| 45 | | 27.5 | | | 25.4 | | | 8.2 | | 30 | | 27.8 | | | | 26.2 | | | | 8.5 | | | 30 | | | | 27.6 | | | 26.1 | | | 8.6 | | 30 | | | 28 | | | | 26 | | | 8 | | |
| 60 | | 27.5 | | | 26 | | | 8.5 | | 45 | | 27.6 | | | | 26.6 | | | | 8.6 | | | 45 | | | | 27.6 | | | 26.2 | | | 8.7 | |  | | |  | | | |  | | |  | | |
|  | |  | |  | | |  | | |  | |  | |  | | | |  | | | |  | | | 60 | | | | 27.5 | | | 26.3 | | | 8.8 | |  | | |  | | | |  | | |  | | |
| 14-Aug  18 | | 15 | | 27 | | | 27.7 | | | 4.9 | |  | |  | | | |  | | | |  | | |  | | | |  | | |  | | |  | |  | | |  | | | |  | | |  | | |
| 30 | | 26.5 | | | 27.9 | | | 4.8 | |  | |  | | | |  | | | |  | | |  | | | |  | | |  | | |  | |  | | |  | | | |  | | |  | | |
| 45 | | 26.4 | | | 28.1 | | | 4.7 | |  | |  | | | |  | | | |  | | |  | | | |  | | |  | | |  | |  | | |  | | | |  | | |  | | |
| 30-Aug  18 | | 15 | | 27.3 | | | N/A | | | 6.1 | | 30 | | 27.3 | | | | 27.4 | | | | 5.3 | | | 30 | | | | 27.3 | | | 27.4 | | | 5.1 | | 30 | | | 28 | | | | 27.6 | | | 6.6 | | |
| 30 | | 27.4 | | | 27.6 | | | 5.3 | | 45 | | 27.3 | | | | 27.4 | | | | 5.4 | | | 45 | | | | 27.4 | | | 27.6 | | | 5.3 | | 45 | | | 28 | | | | 27.8 | | | 6.6 | | |
| 45 | | 27.5 | | | 27.6 | | | 5.5 | | 60 | | 27.3 | | | | 27.4 | | | | 5.4 | | | 60 | | | | 27.4 | | | 27.5 | | | 5.2 | |  | | |  | | | |  | | |  | | |
| 60 | | 27.5 | | | 27.6 | | | 5.5 | |  | |  | | | |  | | | |  | | |  | | | |  | | |  | | |  | |  | | |  | | | |  | | |  | | |
| 11-Sep  18 | | 30 | | 20.6 | | | 29 | | | 3.6 | | 30 | | 20.8 | | | | 29.3 | | | | 4.4 | | | 30 | | | | 20.5 | | | 28.9 | | | 3.6 | | 30 | | | 20.7 | | | | 29.4 | | | 4.5 | | |
| 45 | | 20.5 | | | 29.1 | | | 3.5 | | 45 | | 20.8 | | | | 29.3 | | | | 4.4 | | | 45 | | | | 20.5 | | | 29 | | | 3.6 | | 45 | | | 20.7 | | | | 29.4 | | | 4.5 | | |
| 60 | | 20.6 | | | 29.2 | | | 3.6 | | 60 | | 20.8 | | | | 29.3 | | | | 4.3 | | | 60 | | | | 20.5 | | | 29 | | | 3.6 | | 60 | | | 20.7 | | | | 29.4 | | | 3.1 | | |
| 25-Sep  18 | | 30 | | | 17.9 | | | 29 | | | 5.8 | | 30 | | 17.9 | | | | 29 | | | | 5.8 | | 30 | | | 17.9 | | | | | 28.9 | 6.1 | | | | 30 | | | | 18 | | | | 29.1 | | | 5.8 |
| 45 | | | 18 | | | 29 | | | 5.7 | | 45 | | 17.9 | | | | 29 | | | | 5.7 | | 45 | | | 17.9 | | | | | 28.9 | 5.9 | | | | 45 | | | | 18 | | | | 29.1 | | | 5.7 |
| 60 | | | 18 | | | 29 | | | 5.7 | | 60 | | 17.9 | | | | 29 | | | | 5.7 | | 60 | | | 18 | | | | | 28.9 | 5.8 | | | | 60 | | | | 18 | | | | 29.1 | | | 5.7 |
| 22-Apr-19 | 15 | | 14.6 | | | N/A | | | 7 | | | |  | | | |  | | | |  | | | |  |  | | | | |  | | | | |  | |  | | |  | |  | | | | | | |
| 30 | | 14.6 | | | N/A | | | 7 | | | |  | | | |  | | | |  | | | |  |  | | | | |  | | | | |  | |  | | |  | | | |  | | | | |
| 45 | | 14.6 | | | N/A | | | 7 | | | |  | | | |  | | | |  | | | |  |  | | | | |  | | | | |  | |  | | |  | | | |  | | | | |
| 60 | | 14.6 | | | N/A | | | 7 | | | |  | | | |  | | | |  | | | |  |  | | | | |  | | | | |  | |  | | |  | | | |  | | | | |
| 6-May-19 | 15 | | 12.6 | | | 24.9 | | | 8.6 | | | |  | | | |  | | | |  | | | |  |  | | | | |  | | | | |  | |  | | |  | | | |  | | | | |
| 30 | | 12.6 | | | 25 | | | 8.5 | | | |  | | | |  | | | |  | | | |  |  | | | | |  | | | | |  | |  | | |  | | | |  | | | | |
| 45 | | 12.6 | | | 25.3 | | | 8.4 | | | |  | | | |  | | | |  | | | |  |  | | | | |  | | | | |  | |  | | |  | | | |  | | | | |
| 21-May  19 | 15 | | 18.2 | | | 25.5 | | | 7.3 | | | |  | | | |  | | | |  | | | |  |  | | | | |  | | | | |  | |  | | |  | | | |  | | | | |
| 30 | | 18.2 | | | 25.6 | | | 7.2 | | | |  | | | |  | | | |  | | | |  |  | | | | |  | | | | |  | |  | | |  | | | |  | | | | |
| 45 | | 18.2 | | | 25.6 | | | 7 | | | | 45 | | | 18.1 | | | | 25.6 | | | | 7.2 |  | | 18.1 | | | 25.6 | | | | | | 7.2 | |  |  | | | | | |  | | | | |
| 60 | | 18.2 | | | 25.6 | | | 7.1 | | | |  | | |  | | | |  | | | |  |  | |  | | |  | | | | | |  | |  |  | | | | | |  | | | | |  |
| 4-June  19 | 15 | | 20.1 | | | 25.6 | | | 5.8 | | | | 15 | | | 20.2 | | | | 25.5 | | | | 5.9 | 15 | | 19.9 | | | 25.1 | | | | | | 5.8 | | 15 | 20.2 | | | | | | 25.6 | | | 6.2 | |
| 30 | | 20.2 | | | 25.6 | | | 5.7 | | | | 30 | | | 20.2 | | | | 25.7 | | | | 5.9 | 30 | | 20.1 | | | 25.3 | | | | | | 5.8 | | 30 | 20.2 | | | | | | 25.7 | | | 6.1 | |
| 45 | | 20.1 | | | 25.6 | | | 5.7 | | | | 45 | | | 20.2 | | | | 25.8 | | | | 5.9 | 45 | | 20.1 | | | 25.6 | | | | | | 5.8 | | 45 | 20.2 | | | | | | 25.7 | | | 6.2 | |
| 60 | | 20.1 | | | 25.6 | | | 5.7 | | | |  | | |  | | | |  | | | |  | 60 | | 20.1 | | | 25.6 | | | | | | 5.7 | |  |  | | | | | |  | | |  | |
| 18-June  19 | 15 | | 20.8 | | | 20.1 | | | 9.8 | | | | 15 | | | 20.8 | | | | 20.1 | | | | 9.2 | 15 | | 20.8 | | | 18.8 | | | | | | 9.5 | | 15 | 20.9 | | | | | | 19.8 | | | 9.5 | |
| 30 | | 20.8 | | | 20.3 | | | 9.8 | | | | 30 | | | 20.8 | | | | 20.2 | | | | 9.3 | 30 | | 20.8 | | | 19 | | | | | | 9.4 | | 30 | 20.9 | | | | | | 20.2 | | | 9.3 | |
| 45 | | 20.8 | | | 20.3 | | | 9.8 | | | | 45 | | | 20.8 | | | | 20.2 | | | | 9.3 | 45 | | 20.8 | | | 19.5 | | | | | | 9.1 | |  |  | | | | | |  | | |  | |
| 2-July  19 | 15 | | 23.2 | | | 21 | | | 8.1 | | | | 15 | | | 25.2 | | | | 22.8 | | | | 8.7 | 15 | | 25 | | | 22.1 | | | | | | 9 | | 15 | 25.5 | | | | | | 22.2 | | | 9 | |
| 30 | | 24.9 | | | 22.8 | | | 9.2 | | | | 30 | | | 25.1 | | | | 22.9 | | | | 9 | 30 | | 24.9 | | | 22.7 | | | | | | 9.5 | | 30 | 25.1 | | | | | | 23 | | | 9.1 | |
| 45 | | 25.1 | | | 22.9 | | | 9.2 | | | | 45 | | | 25 | | | | 23.3 | | | | 9.5 | 45 | | 24.8 | | | 22.1 | | | | | | 9.3 | | 45 | 25.1 | | | | | | 23.3 | | | 9.6 | |
| 16-July  19 | 15 | | 27 | | | 26.2 | | | 2.8 | | | | 15 | | | 27.7 | | | | 25.8 | | | | 2.9 | 15 | | 27.8 | | | 26.4 | | | | | | 2.8 | | 15 | 27.1 | | | | | | 25.9 | | | 3.6 | |
| 30 | | 27 | | | 26.3 | | | 3.5 | | | | 30 | | | 27.6 | | | | 26.4 | | | | 2.7 | 30 | | 27.6 | | | 26.4 | | | | | | 2.9 | | 30 | 27.1 | | | | | | 26.2 | | | 3.1 | |
| 45 | | 27.5 | | | 26.4 | | | 3.3 | | | |  | | |  | | | |  | | | |  | 45 | | 27.5 | | | 26.4 | | | | | | 3.1 | |  |  | | | | | |  | | |  | |
|  | |  | | |  | | |  | | | |  | | |  | | | |  | | | |  | 60 | | 27.5 | | | 26.4 | | | | | | 3.2 | |  |  | | | | | |  | | |  | |
| 30-July  19 | 15 | | 26.3 | | | 18.6 | | | 5.4 | | | | 15 | | | 26.3 | | | | 19.8 | | | | 4.8 | 15 | | 26.3 | | | 19.6 | | | | | | 3.7 | | 15 | 26.3 | | | | | | 19.5 | | |  | |
| 30 | | 26.5 | | | 19.4 | | | 3.9 | | | | 30 | | | 26.4 | | | | 19.6 | | | | 4.3 | 30 | | 26.5 | | | 19.9 | | | | | | 3.7 | | 30 | 26.4 | | | | | | 19.7 | | | 5.1 | |
| 45 | | 26.8 | | | 21.7 | | | N/A | | | | 45 | | | 27 | | | | 21.9 | | | | 1.9 | 45 | | 27 | | | 21.9 | | | | | | 1.5 | | 45 | 26.7 | | | | | | 20.8 | | | 4.9 | |
| 14-Aug  19 | 15 | | 24.4 | | | 23.4 | | | 3.4 | | | | 15 | | | 24.4 | | | | 21.2 | | | | 2.4 | 15 | | 24 | | | 21.6 | | | | | | 4.1 | | 15 | 24 | | | | | | 23.2 | | | 3.5 | |
| 30 | | 24.6 | | | 23.7 | | | 1.7 | | | | 30 | | | 24.3 | | | | 23 | | | | 1.7 | 30 | | 24.3 | | | 21.8 | | | | | | 3.1 | | 30 | 24.1 | | | | | | 23.4 | | | 0.8 | |
| 45 | | 24.7 | | | 23.8 | | | 1.3 | | | | 45 | | | 24.5 | | | | 23.7 | | | | 1.5 | 45 | | 24.7 | | | 23.9 | | | | | | 1.5 | | 45 | 24.4 | | | | | | 23.4 | | | 0.7 | |
| 60 | | 24.7 | | | 24.9 | | | 1.3 | | | | 60 | | | 24.6 | | | | 23.8 | | | | 1.3 | 60 | | 24.7 | | | 24.7 | | | | | | 0.9 | | 60 | 24.5 | | | | | | 23.4 | | | 0.5 | |
| 26-Aug  19 | 15 | | 23.9 | | | 18.5 | | | 9.7 | | | | 15 | | | 24.2 | | | | N/A | | | | 8.7 | 15 | | 24 | | | N/A | | | | | | 8.1 | | 15 | 24.4 | | | | | | 25 | | | 0.3 | |
| 30 | | 23.9 | | | 21.5 | | | 8.5 | | | | 30 | | | 24.2 | | | | 24.9 | | | | 8.3 | 30 | | 23.9 | | | 24.7 | | | | | | 8 | | 30 | 24.3 | | | | | | 25.2 | | | 9.2 | |
| 45 | | 23.9 | | | 23.6 | | | 8.2 | | | | 45 | | | 24.2 | | | | 24.9 | | | | 8.3 | 45 | | 23.9 | | | 24.7 | | | | | | 8.1 | | 45 | 24.3 | | | | | | 25.3 | | | 9.9 | |
| 60 | | 23.9 | | | 24.1 | | | 8.4 | | | | 60 | | | 23.8 | | | | 25.2 | | | | 8 | 60 | | 23.9 | | | 24.8 | | | | | | 8.1 | | 60 | 24.3 | | | | | | 25.3 | | | 10.4 | |
| 10-Sep  19 | 15 | | 24.8 | | | 19.2 | | | 11.8 | | | | 15 | | | 24.9 | | | | 22.9 | | | | 11.9 | 15 | | 24.8 | | | 22.3 | | | | | | 10.9 | | 15 | 24.7 | | | | | | 23.5 | | | 10.9 | |
| 30 | | 24.9 | | | 21.2 | | | 10.2 | | | | 30 | | | 24.9 | | | | 22.6 | | | | 12.3 | 30 | | 24.8 | | | 22.4 | | | | | | 11.6 | | 30 | 24.7 | | | | | | 23.5 | | | 11.4 | |
| 45 | | 23.8 | | | 21.7 | | | 12.1 | | | | 45 | | | 24.9 | | | | 22.9 | | | | 12.4 | 45 | | 24.7 | | | 22.7 | | | | | | 12.2 | | 45 | 24.6 | | | | | | 23.6 | | | 11.3 | |
| 60 | | 24.3 | | | 22.2 | | | 12.5 | | | |  | | |  | | | |  | | | |  | 60 | | 24.4 | | | 23.1 | | | | | | 11.5 | | 60 |  | | | | | |  | | | 10.6 | |
| 24-Sep  19 | 15 | | 23 | | | 22.5 | | | 8.6 | | | | 15 | | | 23.6 | | | | 24.5 | | | | 8.8 | 15 | | 23.1 | | | 24 | | | | | | 8.5 | | 15 | 23.3 | | | | | | 24.8 | | |  | |
| 30 | | 23 | | | 23 | | | 8.5 | | | | 30 | | | 23.3 | | | | 24.6 | | | | 8.2 | 30 | | 23.1 | | | 24.2 | | | | | | 8.3 | | 30 | 23.3 | | | | | | 24.9 | | | 10.6 | |
| 45 | | 23 | | | 23.2 | | | 8.7 | | | | 45 | | | 23.2 | | | | 24.7 | | | | 7.8 | 45 | | 23.1 | | | 24.2 | | | | | | 8.3 | | 45 | 22.9 | | | | | | 25.1 | | | 10.4 | |
| 60 | | 22.9 | | | 23.6 | | | 8.6 | | | | 60 | | | 23 | | | | 24.8 | | | | 5.1 | 60 | | 23.1 | | | 24.4 | | | | | | 7 | | 60 |  | | | | | |  | | | 7.3 | |
| 10-Oct  19 | 15 | | 18.6 | | | 25.2 | | | 7.5 | | | | 15 | | | 18.4 | | | | 25.7 | | | | 7.5 | 15 | | 18.3 | | | 25.6 | | | | | | 7.5 | | 15 | 18.6 | | | | | | 25.9 | | | 7.3 | |
| 30 | | 18.6 | | | 25.4 | | | 7.4 | | | | 30 | | | 18.5 | | | | 25.9 | | | | 7.2 | 30 | | 18.4 | | | 25.6 | | | | | | 7.2 | | 30 | 18.6 | | | | | | 25.9 | | | 7.3 | |
| 45 | | 18.6 | | | 25.5 | | | 7.2 | | | | 45 | | | 18.5 | | | | 25.9 | | | | 6.8 | 45 | | 18.4 | | | 25.8 | | | | | | 6.8 | | 45 | 18.6 | | | | | | 26 | | | 6.2 | |
| 60 | | 18.6 | | | 25.5 | | | 7.1 | | | | 60 | | | 18.5 | | | | 25.9 | | | | 6.9 | 60 | | 18.5 | | | 25.8 | | | | | | 6.9 | | 60 | 18.7 | | | | | | 26 | | | 5.1 | |
