# Supplementary material for: Comparison of Oyster Aquaculture Methods and Their Potential to Enhance Microbial Nitrogen Removal From Coastal Ecosystems
Source: Frontiers journal article supplement (doi:10.3389/fmars.2021.633314), 2021-03-24
Supplement: Table_4.DOCX [file Table_4.DOCX]

**Table S4.** Summary of two-way ANOVA results for the 2018 and 2019 nitrogen production measurements. OG: Oyster Gro’, FB: Floating Bag, BC: Bottom Cage.

|  |  | | |  | |  |  |
| --- | --- | --- | --- | --- | --- | --- | --- |
| *2018* | TWO-WAY ANOVA | | | |
|  | SS | Df | F-VALUE | P-VALUE |
| TREATMENT | 32.532 | 3 | 245.762 | < 2.2E-16* |
| TIME | 51.274 | 8 | 145.255 | < 2.2E-16* |
| INTERACTION | 11.685 | 24 | 11.035 | < 2.2E-16* |
| RESIDUALS | 4.545 | 103 |  |  |
|  |  |  |  |  |
| *2019* |  | | |
| TREATMENT | 7.970 | 3 | 87.706 | < 2.2E-16* |
| TIME | 39.819 | 10 | 131.459 | < 2.2E-16* |
| INTERACTION | 8.118 | 30 | 8.934 | 1.04E-15* |
| RESIDUALS | 2.544 | 84 |  |  |

*Two-Way ANOVA is significant at the 0.05 level
