# Supplementary material for: Comparison of Oyster Aquaculture Methods and Their Potential to Enhance Microbial Nitrogen Removal From Coastal Ecosystems
Source: Frontiers journal article supplement (doi:10.3389/fmars.2021.633314), 2021-03-24
Supplement: Table_6.DOCX [file Table_6.DOCX]

**Table S6.** Summary of two-way ANOVA for the 2019 RT-qPCR expression results of the nitrogen cycling genes. OG: Oyster Gro’, FB: Floating Bag, BC: Bottom Cage.

|  |  | | |  | |  |  |
| --- | --- | --- | --- | --- | --- | --- | --- |
| *nosZ* | TWO-WAY ANOVA | | | |
|  | SS | Df | F-VALUE | P-VALUE |
| TREATMENT | 2.156 | 3 | 73.251 | < 2.2E-16* |
| TIME | 1.223 | 11 | 11.339 | 3.65E-13* |
| INTERACTION | 2.029 | 33 | 6.270 | 1.00E-12* |
| RESIDUALS | 0.932 | 95 |  |  |
|  |  |  |  |  |
| *narG* |  | | |
| TREATMENT | 4.102 | 3 | 33.380 | 8.02E-15* |
| TIME | 245.043 | 11 | 543.818 | < 2.2E-16* |
| INTERACTION | 12.034 | 33 | 8.903 | < 2.2E-16* |
| RESIDUALS | 3.892 | 95 |  |  |
|  |  |  |  |  |
| *nrfA* |  |  |  |  |
| TREATMENT | 69.669 | 3 | 1971.956 | < 2.2E-16* |
| TIME | 23.809 | 11 | 183.788 | < 2.2E-16* |
| INTERACTION | 25.841 | 33 | 66.492 | < 2.2E-16* |
| RESIDUALS | 1.083 | 92 |  |  |
|  |  |  |  |  |
| *hzo* |  |  |  |  |
| TREATMENT | 39.378 | 3 | 1197.742 | < 2.2E-16* |
| TIME | 11.993 | 11 | 99.483 | < 2.2E-16* |
| INTERACTION | 57.9 | 33 | 160.102 | < 2.2E-16* |
| RESIDUALS | 1.008 | 92 |  |  |

*Two-Way ANOVA is significant at the 0.05 level
